# Supplementary material for: Influence of lipid vesicle properties on the function of conjugation dependent membrane active peptides
Source: Royal Society of Chemistry journal article supplement (doi:10.1039/d4tb01107d), 2024-01-01
Supplement: d4tb01107d1.pdf [file d4tb01107d1.pdf]

## Supporting Information

# Influence of Lipid Vesicle Properties on the Function of Conjugation Dependent Membrane Active Peptides

*Alexandra Iversen,<sup>†</sup> Johanna Utterström,<sup>†</sup> Lalit Pramod Khare, Daniel Aili\**

Laboratory of Molecular Materials, Division of Biophysics and Bioengineering, Department of Physics, Chemistry, and Biology, Linköping University, 581 83 Linköping, Sweden.

<sup>†</sup> *Equal contributions*

\* Corresponding author: [daniel.aili@liu.se](mailto:daniel.aili@liu.se)

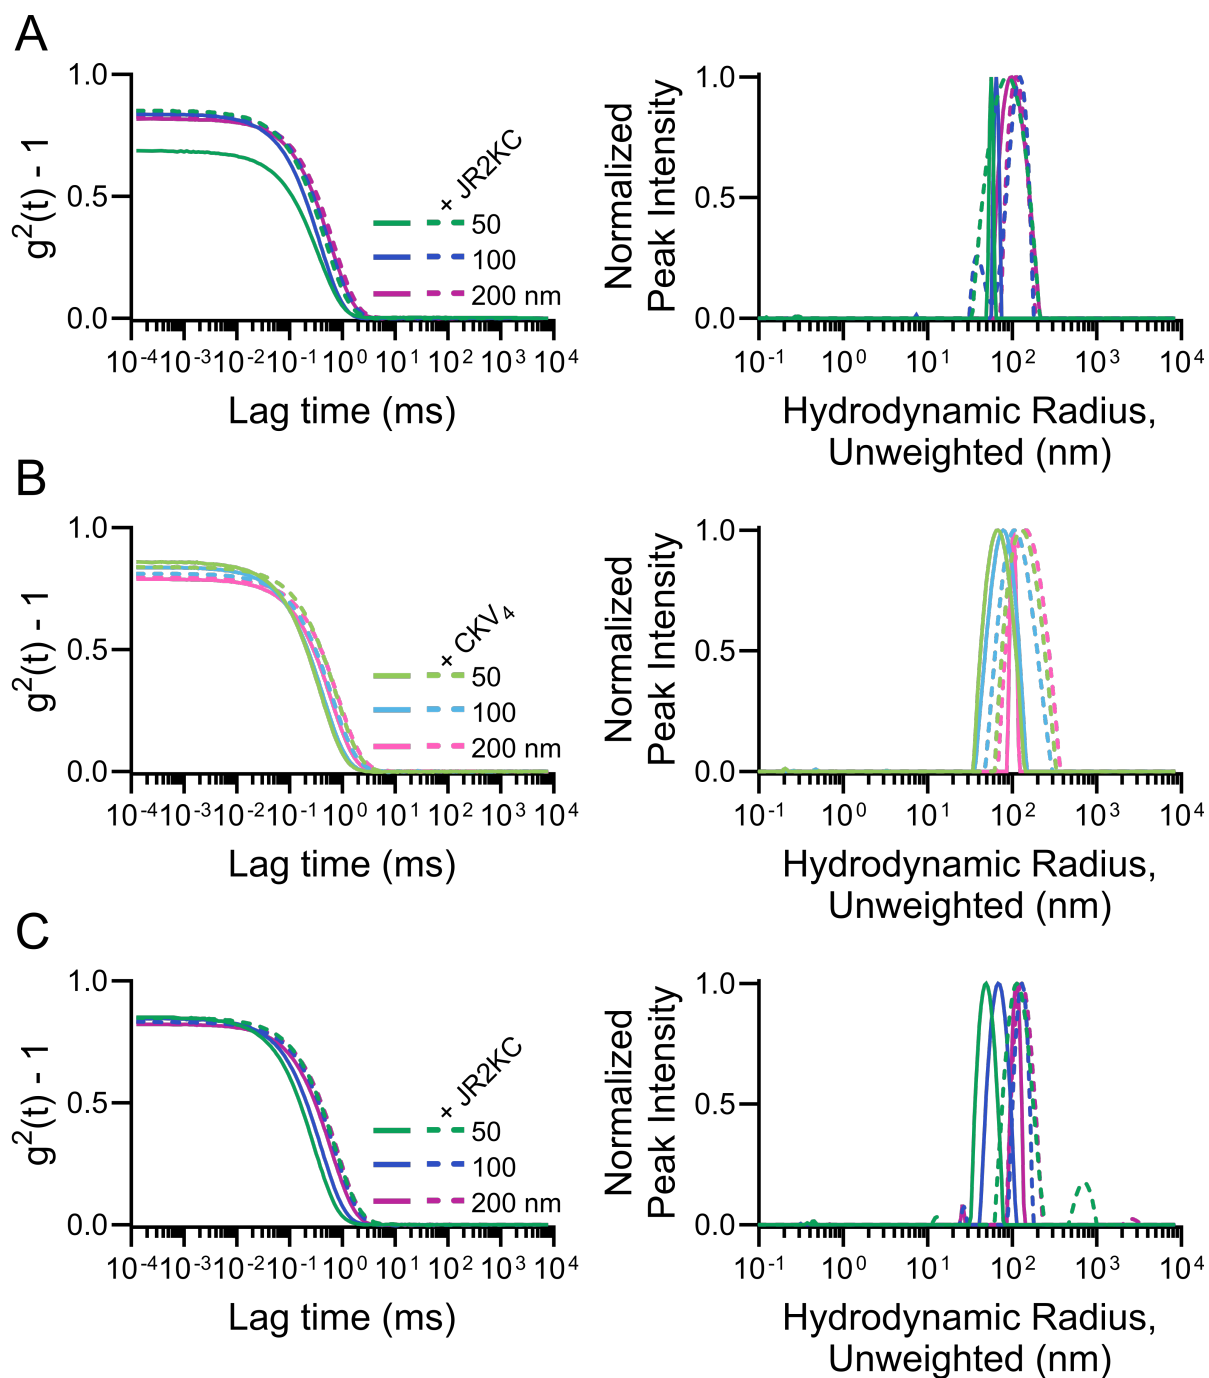

**Figure S1.** DLS correlation function and size distribution of 40  $\mu$ M 50, 100, and 200 nm A) 95:5 POPC:MPB liposomes before and after 30 min incubation with 4  $\mu$ M JR2KC. B) 95:5 POPC:MPB liposomes before and after 2 hours incubation with 10  $\mu$ M CKV<sub>4</sub>. C) 65:5:30 POPC:MPB:Chol liposomes before and after 30 min incubation with 4  $\mu$ M JR2KC.

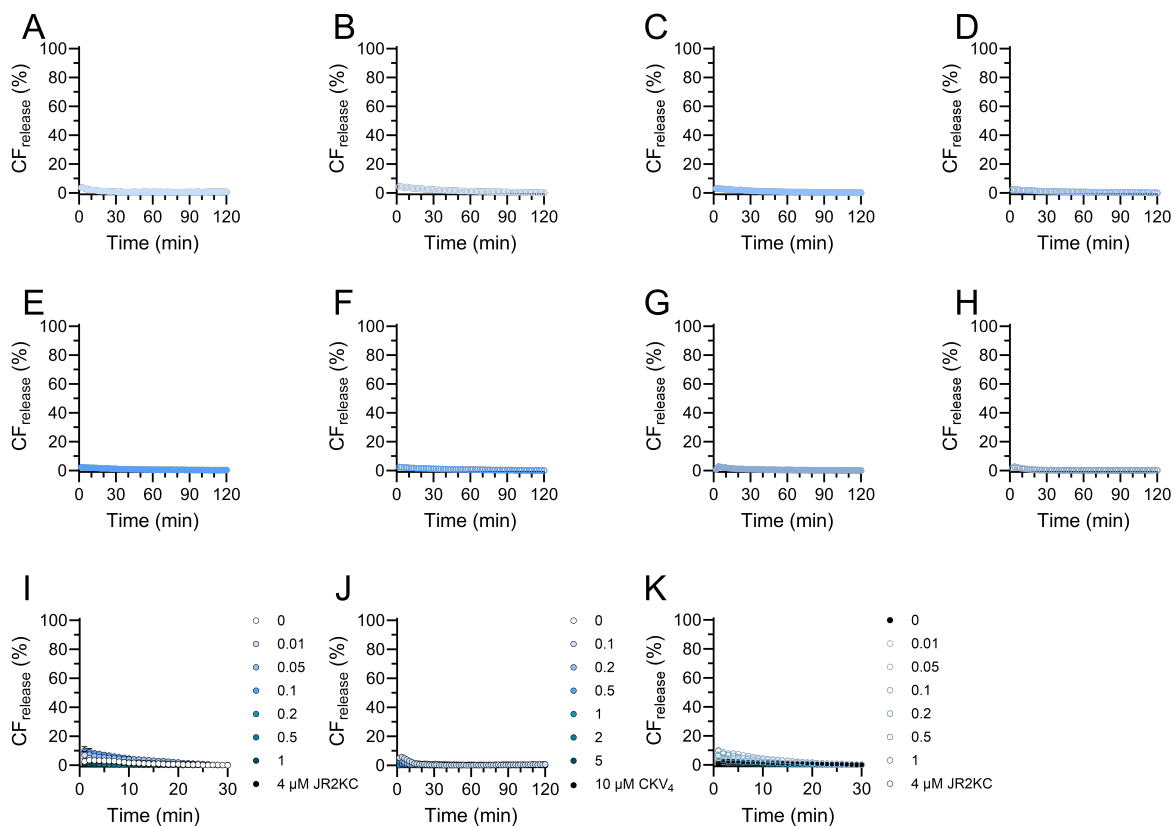

**Figure S2.** CF release kinetics during 2 hours from 40  $\mu\text{M}$  A) 95:5:0 50 nm, B) 65:5:30 50 nm, C) 95:5:0 100 nm, D) 65:5:30 100 nm, E) 95:5:0 200 nm, F) 65:5:30 200 nm, G) 100:0:0 100 nm, H) 70:0:30 100 nm POPC:MPB:Chol liposomes, I-J) 100:0:0 100 nm POPC:MPB:Chol liposomes incubated with various concentrations of I) JR2KC, or J) CKV<sub>4</sub>, and K) 70:0:30 100 nm POPC:MPB:Chol liposomes incubated with various concentrations of JR2KC.

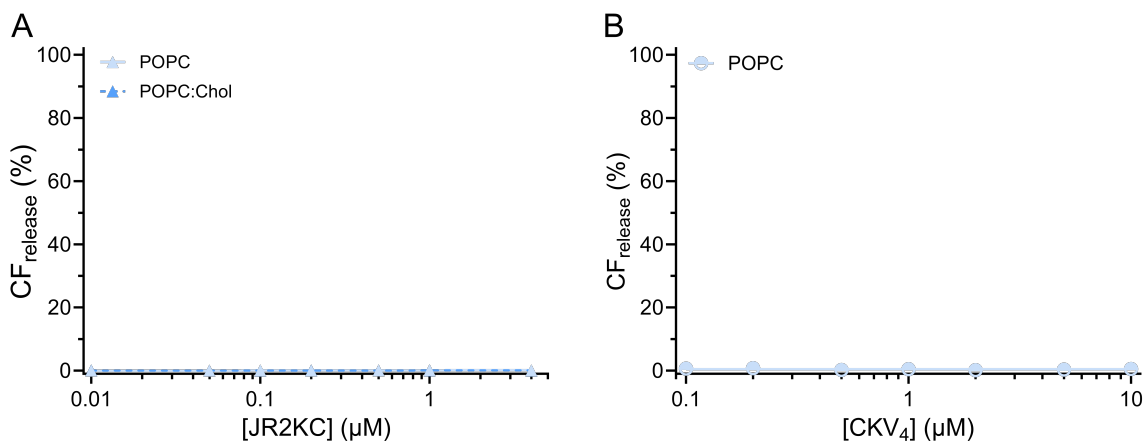

**Figure S3.** A) Total CF release from 40  $\mu\text{M}$  100 nm 100:0, 70:30 POPC:Chol liposomes after 30 min incubation with JR2KC. B) Total CF release from 40  $\mu\text{M}$  100 nm 100 mol% POPC liposomes after 2 hours incubation with CKV<sub>4</sub>.

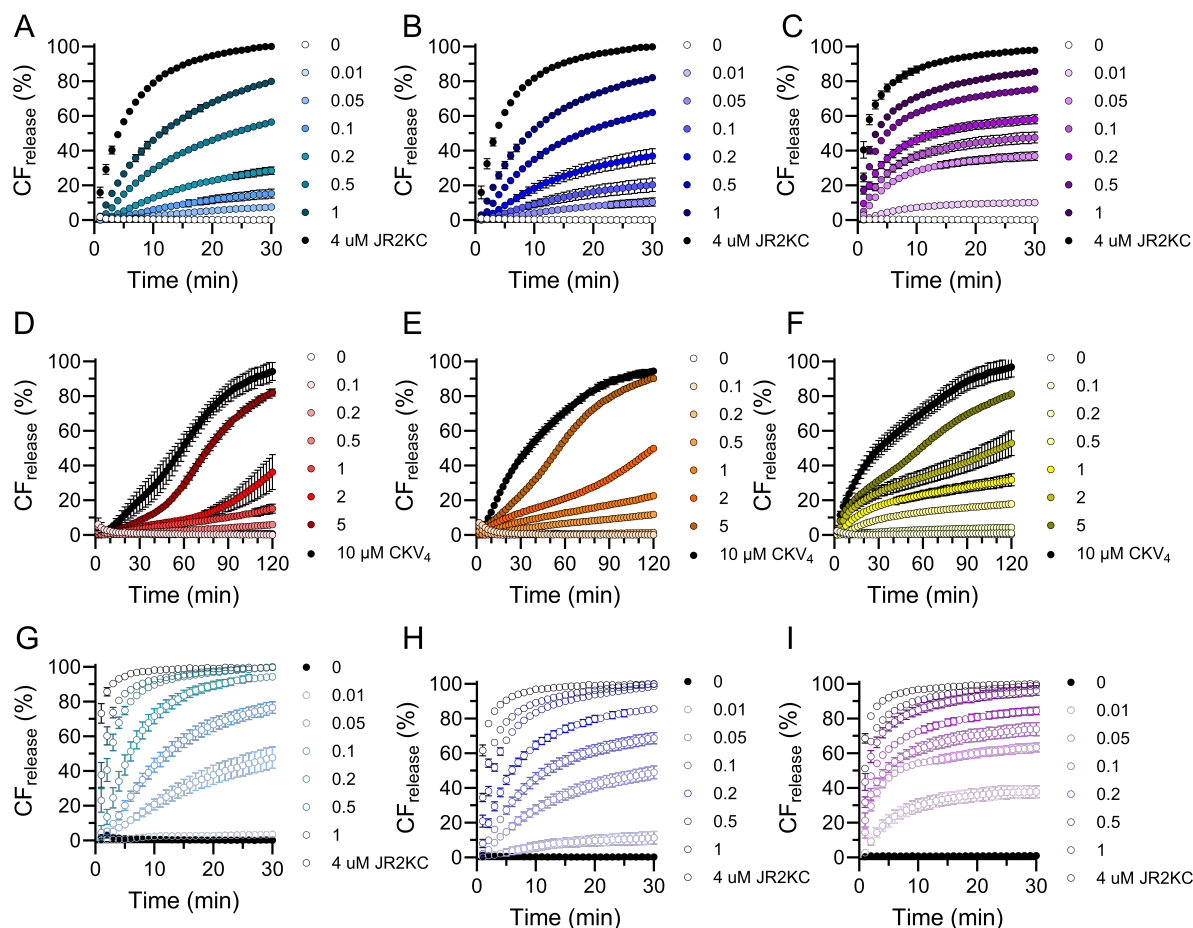

**Figure S4.** A-C) CF release kinetics during 30 min incubation with varying JR2KC concentrations and 40  $\mu\text{M}$  A) 50 nm, B) 100 nm, C) 200 nm 95:5 POPC:MPB liposomes. D-F) CF release kinetics during 2 hours incubation with varying CKV<sub>4</sub> concentrations and 40  $\mu\text{M}$  D) 50 nm, E) 100 nm, F) 200 nm 95:5 POPC:MPB liposomes. G-I) CF release kinetics during 30 min incubation with varying JR2KC concentrations and 40  $\mu\text{M}$  G) 50 nm, H) 100 nm, I) 200 nm 65:5:30 POPC:MPB:Chol liposomes.

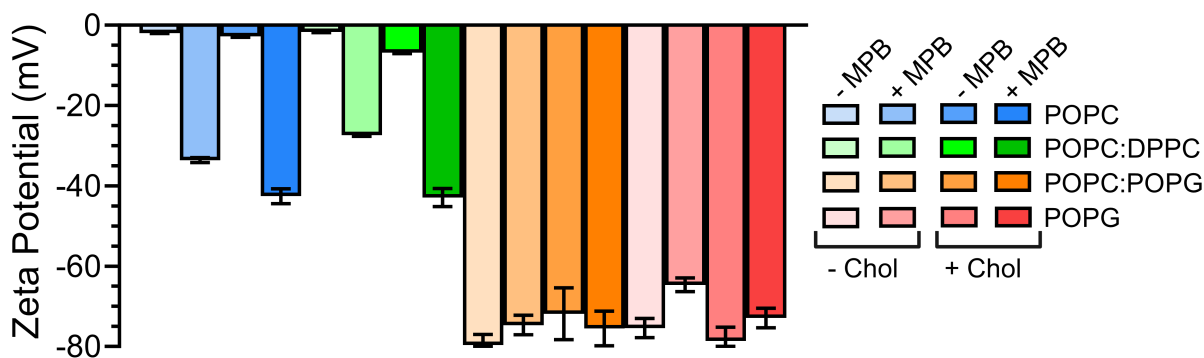

**Figure S5.** Zeta potential of liposomes with varying mol% lipids with saturated acyl chains and negatively charged headgroup, with and without MPB and cholesterol.



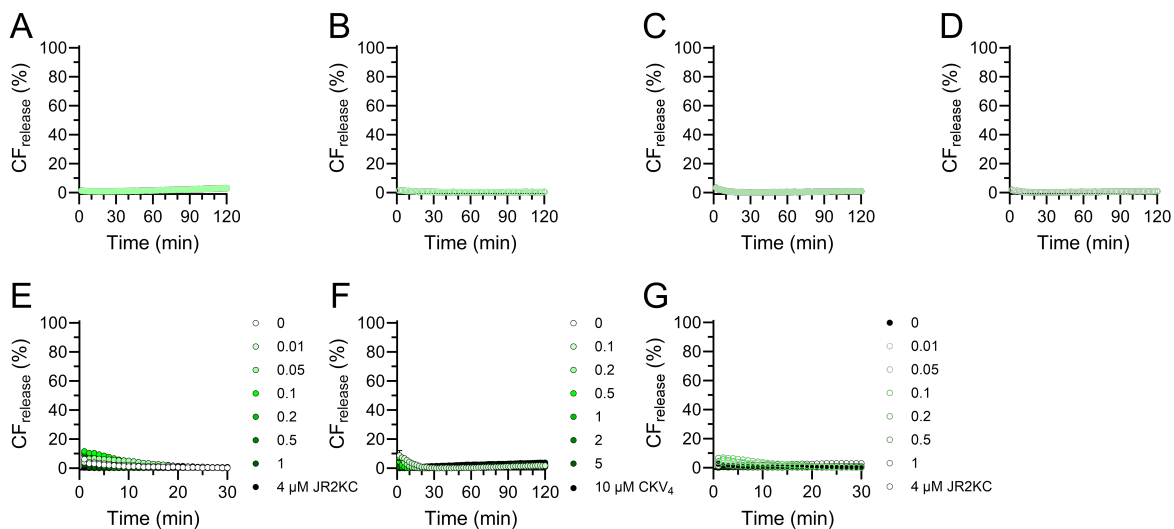

**Figure S6.** CF release kinetics during 2 hours from 40  $\mu\text{M}$  A) 47.5:47.5:5:0, B) 32.5:32.5:5:30, C) 50:50:0:0, D) 35:35:0:30 100 nm POPC:DPPC:MPB:Chol liposomes. E-F) 50:50:0:0 POPC:DPPC:MPB:Chol liposomes incubated with various concentrations of E) JR2KC, or F) CKV<sub>4</sub>, and G) 35:35:0:30 POPC:DPPC:MPB:Chol liposomes incubated with various concentrations of JR2KC.

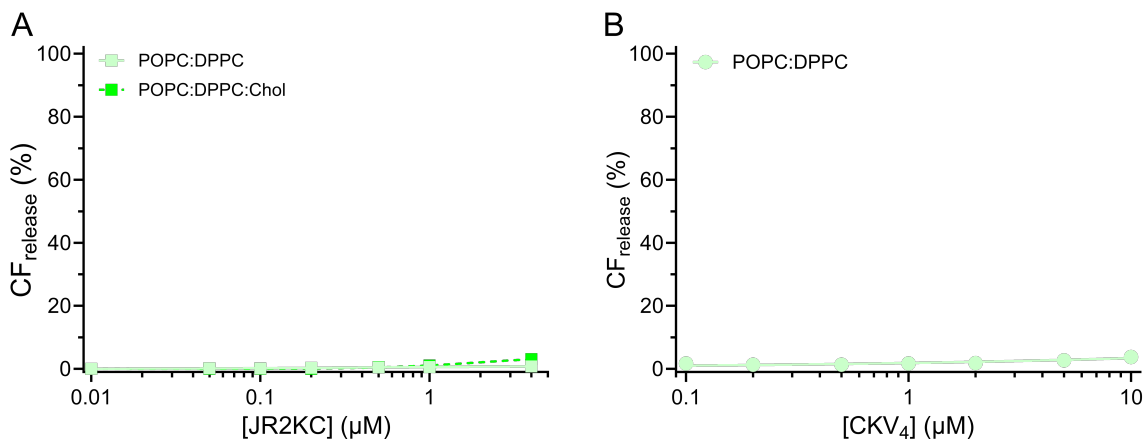

**Figure S7.** A) Total CF release from 40  $\mu\text{M}$  50:50:0, 35:35:30 POPC:DPPC:Chol liposomes after 30 min incubation with JR2KC. B) Total CF release from 40  $\mu\text{M}$  50:50 POPC:DPPC liposomes after 2 hours incubation with CKV<sub>4</sub>.

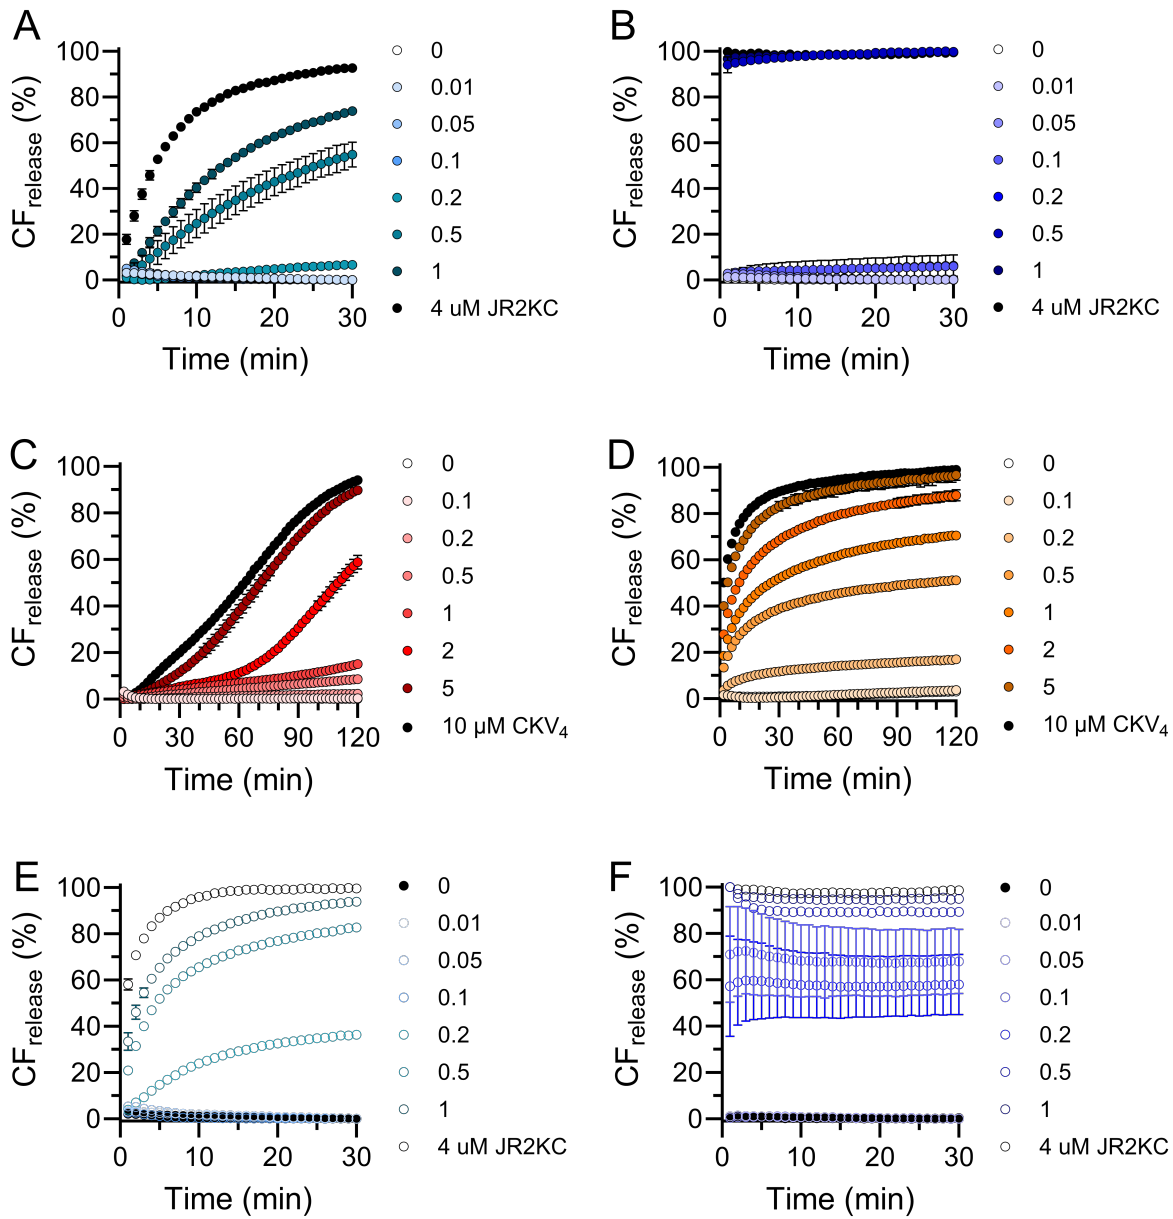

**Figure S8.** A-B) CF release kinetics during 30 min incubation with varying JR2KC concentrations and 40  $\mu$ M A) 95:0:5, B) 47.5:47.5:5 POPC:DPPC:MPB liposomes. C-D) CF release kinetics during 2 hours incubation with varying CKV<sub>4</sub> concentrations and C) 95:0:5, D) 47.5:47.5:5 POPC:DPPC:MPB liposomes. E-F) CF release kinetics during 30 min incubation with varying JR2KC concentrations and E) 65:0:5:30, F) 32.5:32.5:5:30 POPC:DPPC:MPB:Chol liposomes.

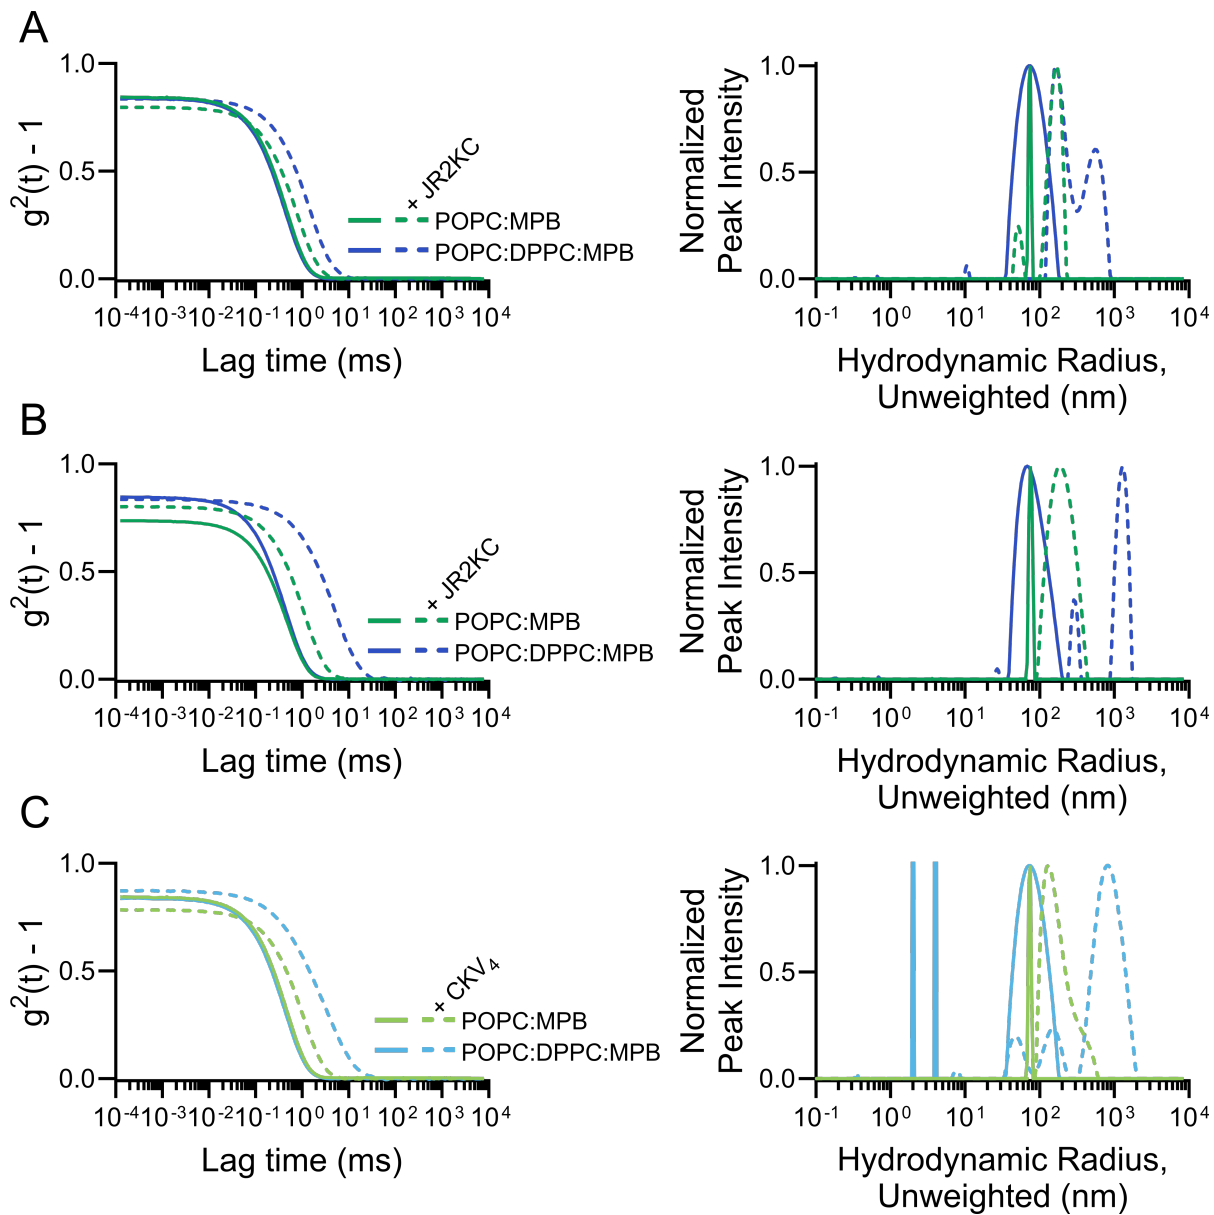

**Figure S9.** A) DLS correlation function and size distribution of 40  $\mu\text{M}$  95:0:5 and 47.5:47.5:5 POPC:DPPC:MPB liposomes before and after 30 min incubation with 4  $\mu\text{M}$  JR2KC. B) DLS correlation function and size distribution of 40  $\mu\text{M}$  65:0:5:30 and 32.5:32.5:5:30 POPC:DPPC:MPB:Chol liposomes before and after 30 min incubation with 4  $\mu\text{M}$  JR2KC. C) DLS correlation function and size distribution of 40  $\mu\text{M}$  95:0:5 and 47.5:47.5:5 POPC:DPPC:MPB liposomes before and after 2 hours incubation with 10  $\mu\text{M}$  CKV<sub>4</sub>.

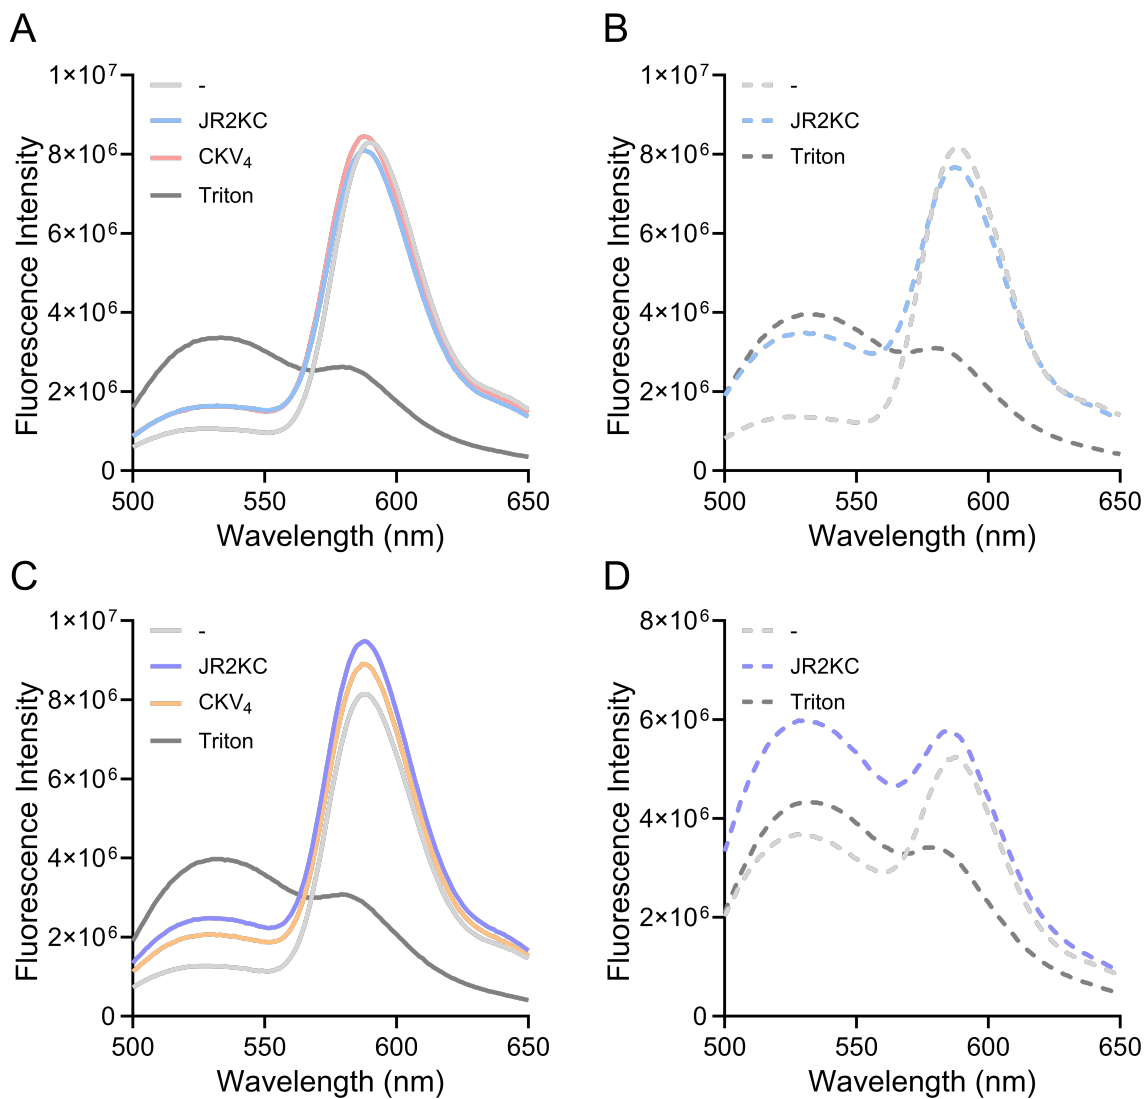

**Figure S10.** FRET wavelength scan of 40  $\mu$ M A) 94:0:5:0:0.5:0.5, B) 64:0:5:30:0.5:0.5, C) 47:47:5:0:0.5:0.5, D) 32:32:5:30:0.5:0.5 POPC:DPPC:MPB:Chol:Rh:NBD liposomes before and after 30 min incubation with 4  $\mu$ M JR2KC or 2 hours incubation with 10  $\mu$ M CKV<sub>4</sub> respectively and after addition of triton.

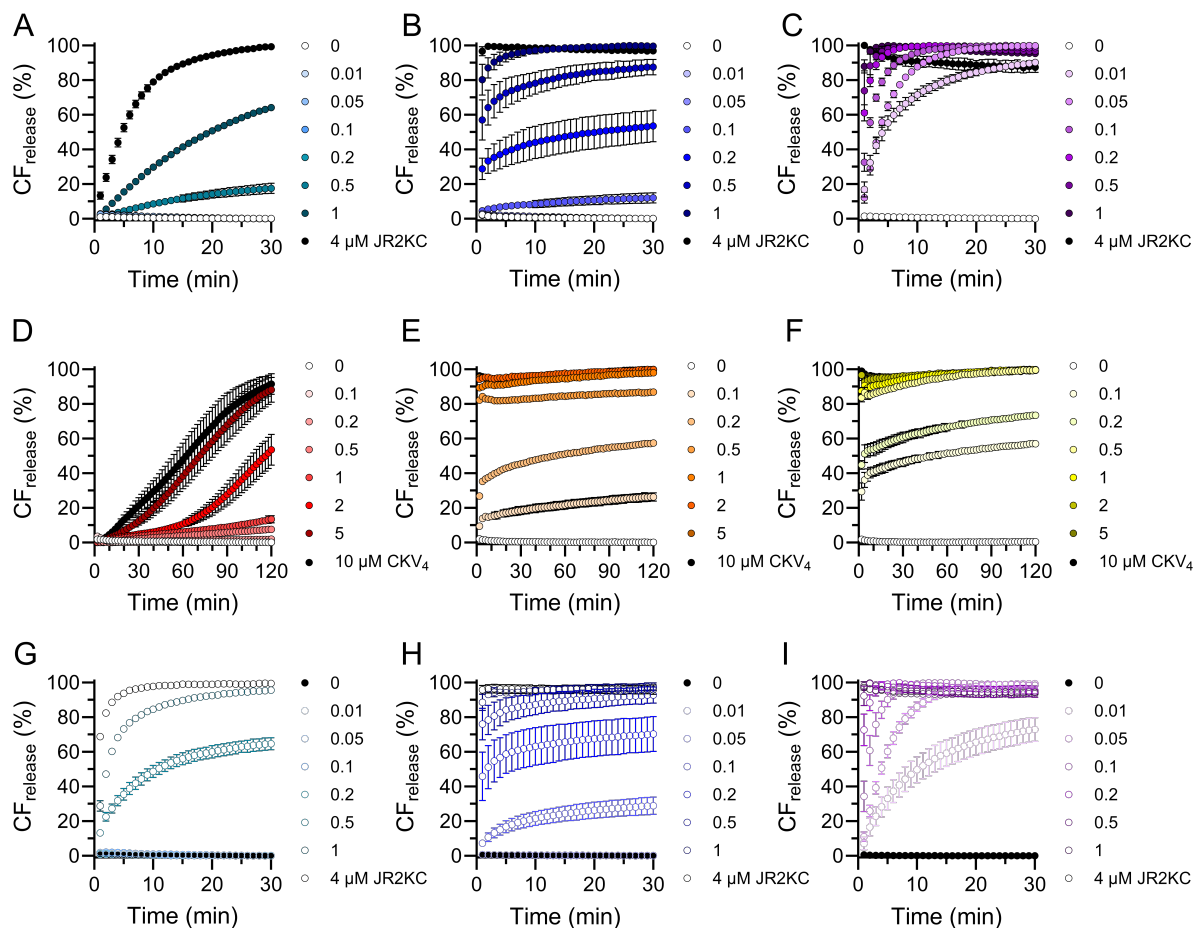

**Figure S11.** A-C) CF release kinetics during 30 min incubation with varying JR2KC concentrations and 40 μM A) 95:0:5, B) 47.5:47.5:5, C) 0:95:5 POPC:POPG:MPB liposomes. D-F) CF release kinetics during 2 hours incubation with varying CKV<sub>4</sub> concentrations and 40 μM D) 95:0:5, E) 47.5:47.5:5, F) 0:95:5 POPC:POPG:MPB liposomes. G-I) CF release kinetics during 30 min incubation with varying JR2KC concentrations and 40 μM G) 65:0:5:30, H) 32.5:32.5:5:30, I) 0:65:5:30 POPC:POPG:MPB:Chol liposomes.

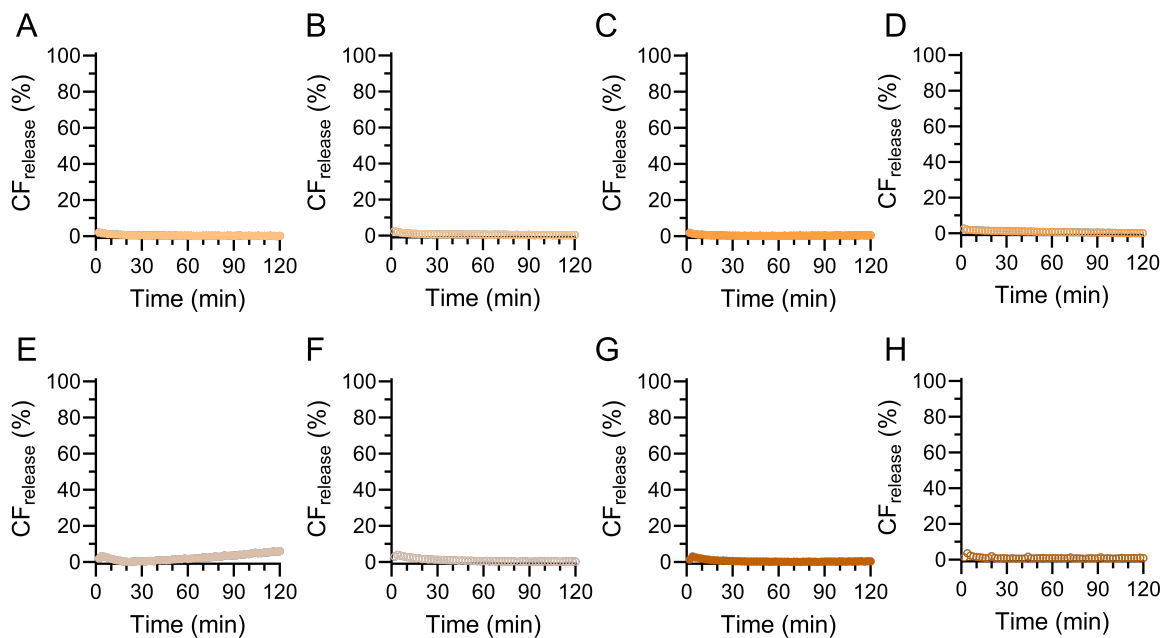

**Figure S12.** CF release kinetics during 2 hours from 40  $\mu$ M A) 47.5:47.5:5:0, B) 32.5:32.5:5:30, C) 0:95:5:0, D) 0:65:5:30, E) 50:50:0:0, F) 35:35:0:30, G) 0:100:0:0, H) 0:70:0:30 100 nm POPC:DPPC:POPG:MPB:Chol liposomes.

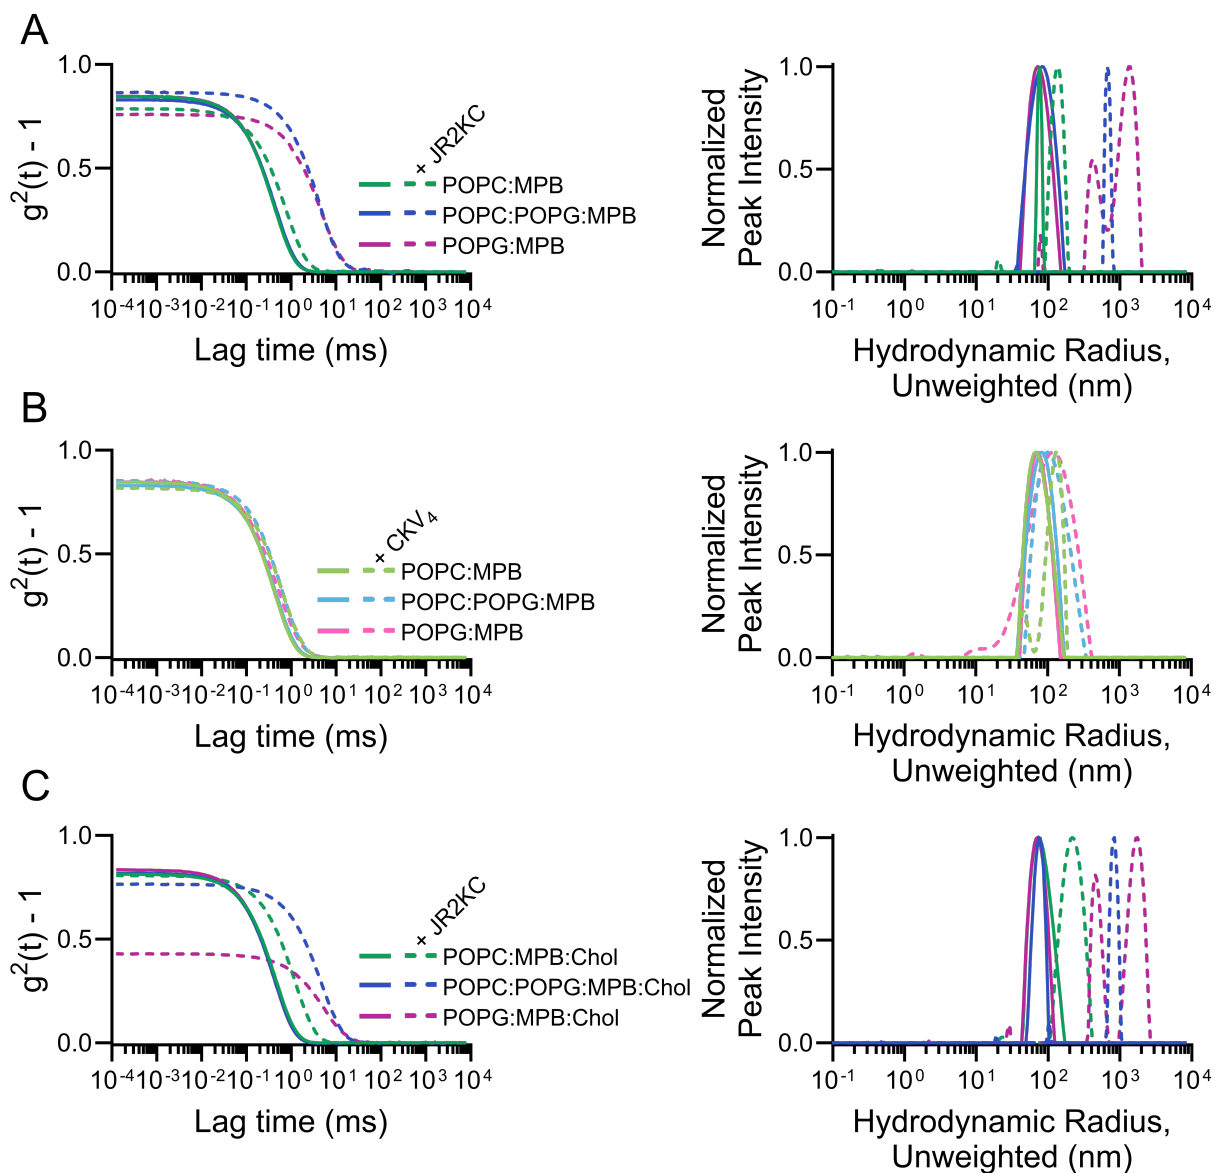

**Figure S13.** A) DLS correlation function and size distribution of 40  $\mu$ M 95:0:5, 47.5:47.5:5, and 0:95:5 POPC:POPG:MPB liposomes before and after 30 min incubation with 4  $\mu$ M JR2KC. B) DLS correlation function and size distribution of 40  $\mu$ M 95:0:5, 47.5:47.5:5, and 0:95:5 POPC:POPG:MPB liposomes before and after 2 hours incubation with 10  $\mu$ M CKV<sub>4</sub>. C) DLS correlation function and size distribution of 40  $\mu$ M 65:0:5:30, 32.5:32.5:5:30, and 0:65:5:30 POPC:POPG:MPB:Chol liposomes before and after 30 min incubation with 4  $\mu$ M JR2KC.

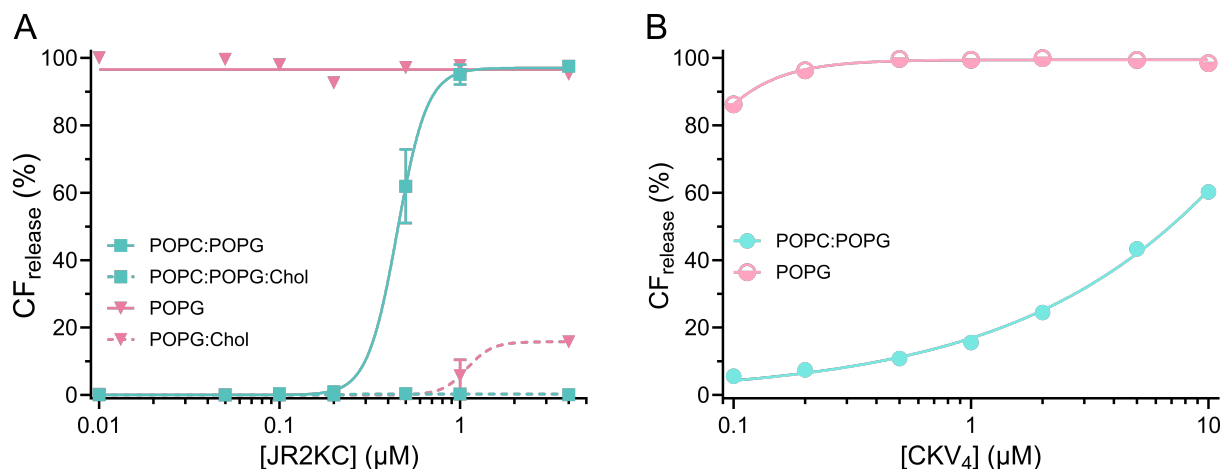

**Figure S14.** A) Total CF release from 40  $\mu\text{M}$  50:50:0, 35:35:30, 0:100:0, 0:70:30 POPC:POPG:Chol liposomes after 30 min incubation with JR2KC. B) Total CF release from 40  $\mu\text{M}$  50:50, and 0:100 POPC:POPG liposomes after 2 hours incubation with CKV<sub>4</sub>.

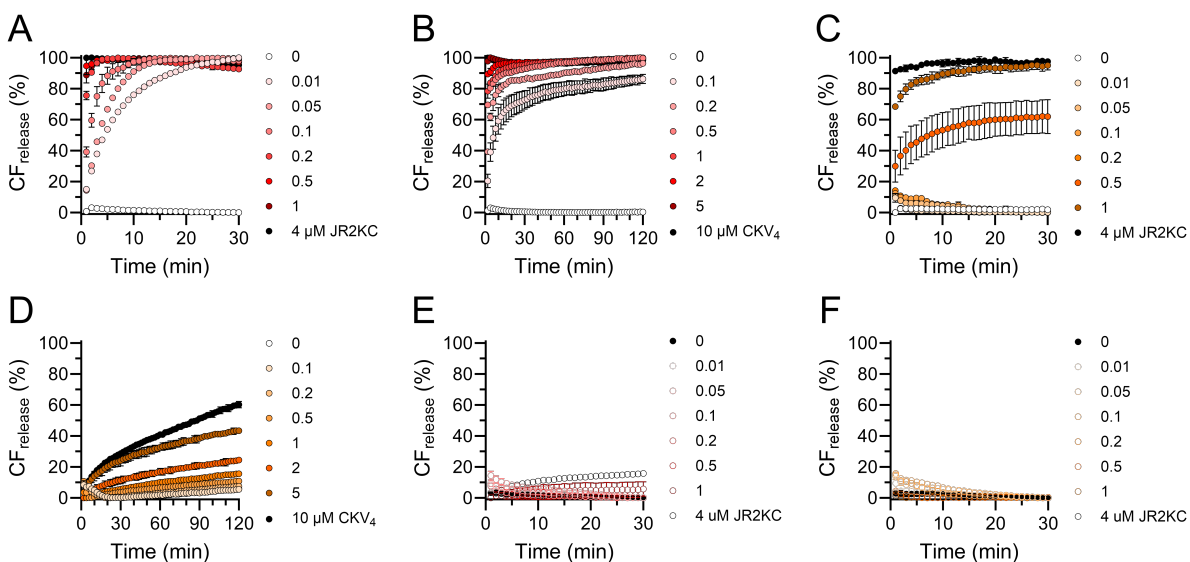

**Figure S15.** CF release kinetics from 40  $\mu\text{M}$  A-B) 100 mol% POPG liposomes over A) 30 min incubation with JR2KC, or B) 2 hours incubation with CKV<sub>4</sub>. C-D) 50:50 POPC:POPG liposomes over C) 30 min incubation with JR2KC, or D) 2 hours incubation with CKV<sub>4</sub>. E) 70:30 POPG:Chol liposomes over 30 min incubation with JR2KC. F) 35:35:30 POPC:POPG:Chol liposomes over 30 min incubation with JR2KC.



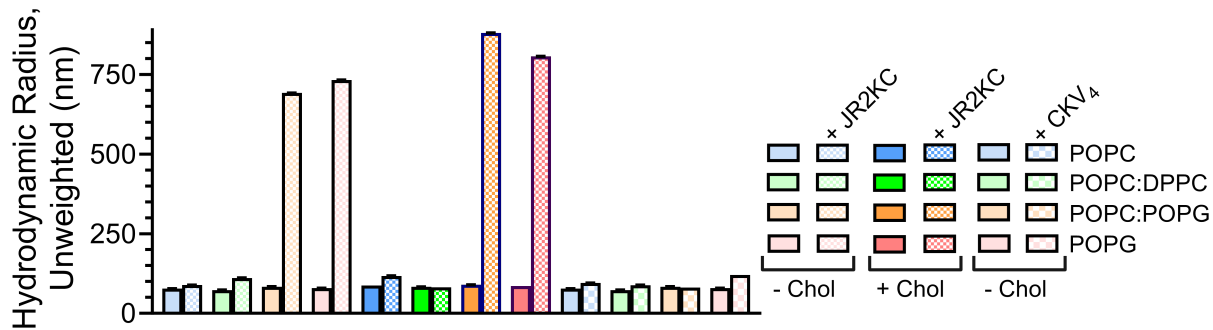

**Figure S16.** Hydrodynamic radius of 40 μM liposomes with varying mol% lipids with saturated acyl chains and negatively charged headgroup before and after 30 min incubation with 4 μM JR2KC or 2 hours incubation with 10 μM CKV<sub>4</sub> respectively.

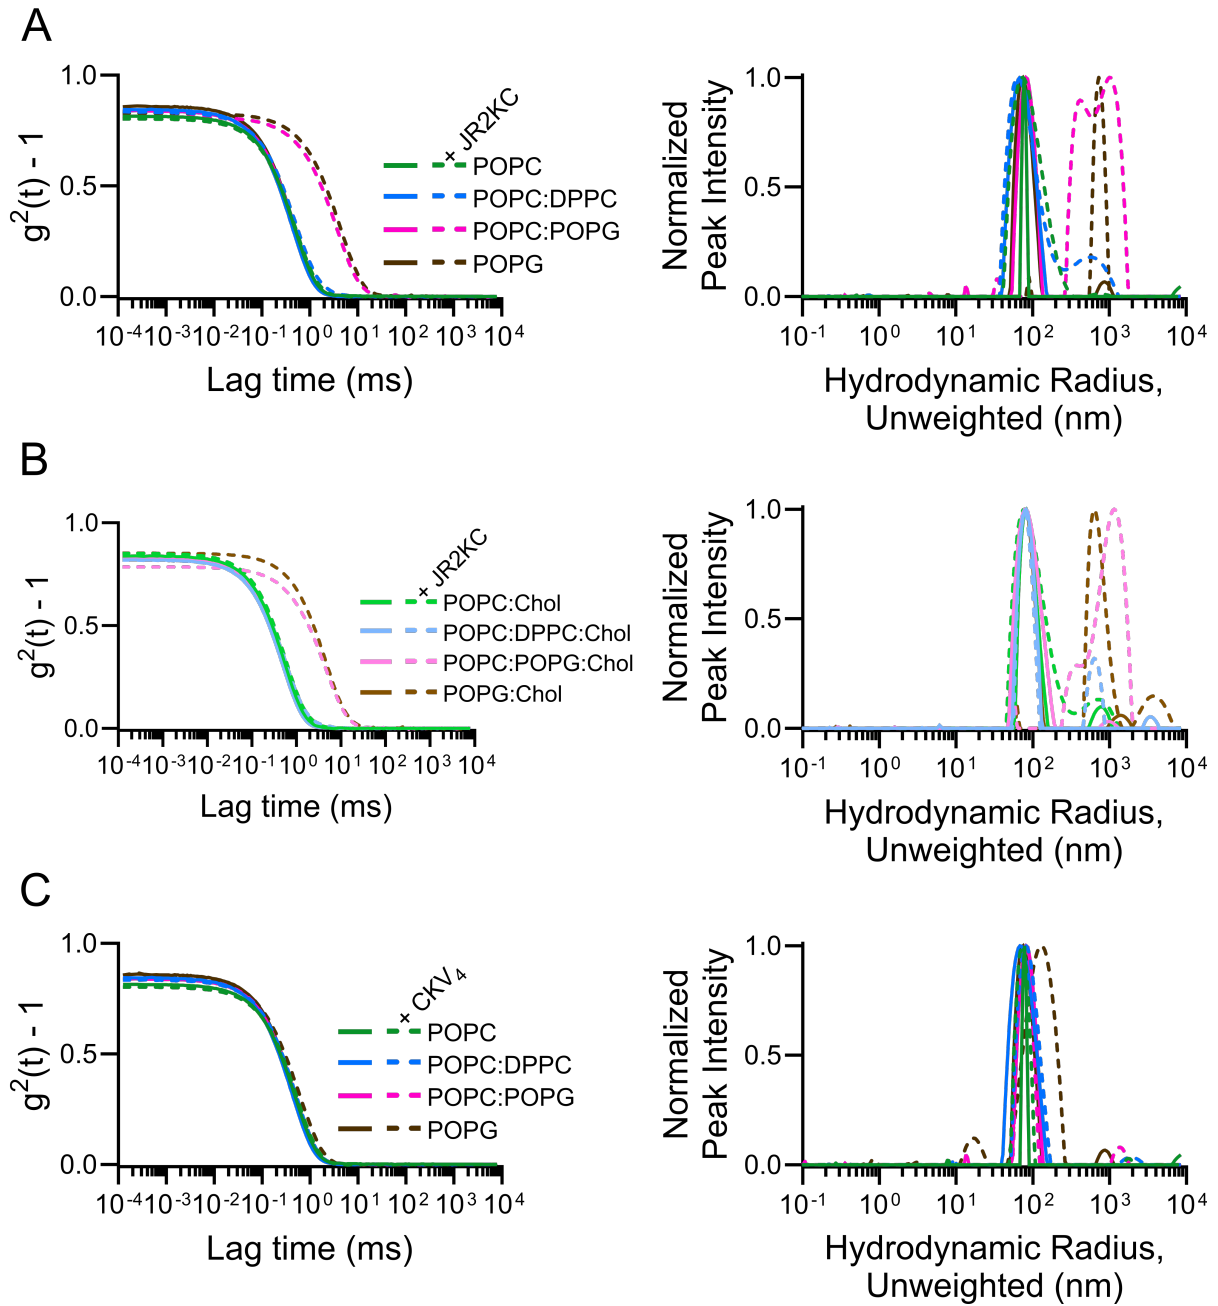

**Figure S17.** A) DLS correlation function and size distribution of 40  $\mu$ M 100:0:0, 50:50:0, 50:0:50 and 0:0:100 POPC:DPPC:POPG liposomes before and after 30 min incubation with 4  $\mu$ M JR2KC. B) DLS correlation function and size distribution of 40  $\mu$ M 70:0:0:30, 35:35:0:30, 35:0:35:30, and 0:0:70:30 POPC:DPPC:POPG:Chol liposomes before and after 30 min incubation with 4  $\mu$ M JR2KC. C) DLS correlation function and size distribution of 40  $\mu$ M 100:0:0, 50:50:0, 50:0:50 and 0:0:100 POPC:DPPC:POPG liposomes before and after 2 hours incubation with 10  $\mu$ M CKV<sub>4</sub>.
